# Supplementary material for: Transcriptional regulatory network triggered by oxidative signals configures the early response mechanisms of japonica rice to chilling stress
Source: Springer Nature journal article supplement (doi:10.1186/1471-2229-10-16), 2010-01-25
Supplement: Additional file 12 [file 1471-2229-10-16-s12.pdf]

**Additional file 12.** Location of transcription factors within QTL associated with seedling vigor and stress response.

| Trait      | QTL ID          | Locus ID      | Genome Coordinates (bp) | Transcription Factor       |                                |
|------------|-----------------|---------------|-------------------------|----------------------------|--------------------------------|
| COLDTL-1   | AQDU006/CQP1    | Os01g67480    | 39538156-39543486       | bHLH (bHLH109)             |                                |
|            |                 | Os01g64000    | 37501439-37502958       | bZIP (ABRE factor)         |                                |
|            |                 | Os01g60020    | 35021120-35019966       | NAC (NAC68)                |                                |
|            |                 | Os01g58420    | 34093922-34094629       | ERF ( <i>AtERF4</i> )      |                                |
|            |                 | Os01g56690    | 33041606-33043265       | bHLH                       |                                |
|            |                 | Os01g57580    | 33599243-33601156       | bHLH (bHLH68)              |                                |
|            | AQAV003         | Os01g09760    | 5026872-5033629         | MYB                        |                                |
|            |                 | Os01g09080    | 4563224-4565179         | WRKY ( <i>WRKY61</i> )     |                                |
| OSADJCAP-1 | AQDX002         | Os01g11910    | 6459511-6461839         | bHLH (bHLH37)              |                                |
|            |                 | Os01g09080    | 4563224-4565179         | WRKY ( <i>WRKY61</i> )     |                                |
| SDLVIG-1   | AQFR014/AQFR044 | Os01g67480    | 39538156-39543486       | bHLH (bHLH109)             |                                |
|            |                 | Os01g64000    | 37501439-37502958       | bZIP (ABRE factor)         |                                |
|            |                 | Os01g60020    | 35021120-35019966       | NAC (NAC68)                |                                |
|            |                 | Os01g58420    | 34093922-34094629       | ERF ( <i>AtERF4</i> )      |                                |
|            |                 | AQFR003       | Os01g09760              | 5026872-5033629            | MYB                            |
| SLTSN-1    | AQEM001/AQEM009 | Os01g64000    | 37501439-37502958       | bZIP ( <i>AREB</i> )       |                                |
|            | AQEM008/qRNTQ-1 | Os01g60020    | 35021120-35019966       | NAC (NAC68)                |                                |
| CHLCN-2    | AQCW012         | Os02g52780    | 32270722-32275784       | bZIP ( <i>ABI5</i> )       |                                |
|            | AQDB003         | Os02g45450    | 27647111-27647785       | ERF ( <i>DREB1A/CBF3</i> ) |                                |
|            | AQCW014         | Os02g43790    | 26417556-26416645       | ERF ( <i>AtERF13</i> )     |                                |
| OSADJCAP-2 | CQH6, oa2.1     | Os02g45450    | 27647111-27647785       | ERF ( <i>DREB1A/CBF3</i> ) |                                |
|            |                 | Os02g43790    | 26417556-26416645       | ERF ( <i>AtERF13</i> )     |                                |
| SDLVIG-2   | AQFR004         | Os02g45450    | 27647111-27647785       | ERF ( <i>DREB1A/CBF3</i> ) |                                |
|            |                 | Os02g43790    | 26417556-26416645       | ERF ( <i>AtERF13</i> )     |                                |
|            |                 | AQFR010       | Os02g52780              | 32275495-32271330          | bZIP ( <i>ABI5</i> )           |
|            |                 | AQFR032       | Os02g41510              | 24873941-24873047          | Myb ( <i>OsMyb4</i> )          |
| CHLCN-3    | CQE15           | Os02g38130    | 23060334-23057308       | NAC (NAC044)               |                                |
|            |                 | Os03g09170    | 4760577-4759684         | ERF ( <i>AtERF058</i> )    |                                |
|            |                 | Os03g08500    | 4352514-4351525         | ERF ( <i>ERF2</i> )        |                                |
|            |                 | Os03g51580    | 29467207-29469656       | bHLH (bHLH118)             |                                |
|            | AQCW008         | Os03g42100    | 23387610-23389006       | bHLH (bHLH131)             |                                |
|            |                 | Os03g21030    | 11918127-1916817        | NAC ( <i>GRAB2</i> )       |                                |
| LFRL-3     | DQE18           | Os03g21060    | 11955043-11953254       | NAC                        |                                |
|            |                 | Os03g21030    | 11918127-1916817        | NAC ( <i>GRAB2</i> )       |                                |
| OSADJCAP-3 | AQFT003/oa3.11  | Os03g21060    | 11955043-11953254       | NAC                        |                                |
|            |                 | CQH12         | Os03g15660              | 8616097-8615321            | ERF ( <i>RAP2.1/2.9/2.10</i> ) |
| SDLVIG-3   | AQEP013         | Os03g51580    | 29467207-29469656       | bHLH (bHLH18)              |                                |
| CHLCN-4    | CQE32           | Os04g43680    | 25625690-25624283       | Myb ( <i>OsMyb4</i> )      |                                |
|            |                 | AQHf012/QDg4b | Os04g52090              | 30720217-30720885          | AP2/ERF ( <i>AtERF4</i> )      |
| COLDTL-4   | AQDU001         | Os04g52090    | 30720217-30720885       | AP2/ERF ( <i>AtERF4</i> )  |                                |
| GERMSP-4   | AQFE110/grm4.1  | Os04g43680    | 25625690-25624283       | Myb ( <i>OsMyb4</i> )      |                                |
| SDLVIG-4   | AQFR036         | Os04g52090    | 30720217-30720885       | AP2/ERF ( <i>AtERF4</i> )  |                                |
| RELWCN-5   | DQE50           | Os05g37730    | 21999887-21998835       | Myb ( <i>DIVARICATA</i> )  |                                |
| SDLVIG-5   | AQEP005         | Os05g46610    | 26904355-26905534       | Myb ( <i>Myb86</i> )       |                                |
|            | AQEP016         | Os05g37730    | 21999887-21998835       | Myb ( <i>DIVARICATA</i> )  |                                |

| Trait      | QTL ID                                           | Locus ID          | Genome Coordinates       | Transcription Factor       |
|------------|--------------------------------------------------|-------------------|--------------------------|----------------------------|
| SALTSN-6   | AQEM002/qSDS-6                                   | Os06g41100        | 24567291-24560518        | bZIP ( <i>TGA10</i> )      |
| CHLCN-8    | CQE69/CQE62                                      | Os08g41320        | 25970024-25972528        | bHLH ( <i>bHLH91</i> )     |
|            |                                                  | Os08g38080        | 23989017-23991063        | bHLH ( <i>bHLH87</i> )     |
|            |                                                  | Os08g38020        | 23951753-23951061        | bZIP ( <i>HY5</i> )        |
|            |                                                  | Os08g36740        | 23061693-23062433        | bHLH ( <i>bHLH121</i> )    |
| OSADJCAP-8 | AQDX013                                          | Os08g38080        | 23989017-23991063        | bHLH ( <i>bHLH87</i> )     |
|            |                                                  | Os08g38020        | 23951753-23951061        | bZIP ( <i>AtbZIP48</i> )   |
|            |                                                  | Os08g36740        | 23061693-23062433        | bHLH ( <i>bHLH121</i> )    |
| SDLVIG-8   | AQFR050/AQFV024/<br>AQFV026/AQFV028/<br>AQFFR013 | Os08g43210        | 27192436-27191681        | ERF ( <i>DREB1B/CBF1</i> ) |
|            |                                                  | Os08g43090        | 27104533-27107970        | bZIP ( <i>RF2b-like</i> )  |
|            | Os08g43070                                       | 27090325-27091116 | AtMyc2 ( <i>bHLH11</i> ) |                            |
|            | Os08g42470                                       | 26708223-26710453 | bHLH ( <i>GBOF-1</i> )   |                            |
|            | AQFV020/AQFV022                                  | Os08g38020        | 23951753-23951061        | bZIP ( <i>AtbZIP48</i> )   |
|            | Os08g36740                                       | 23061693-23062433 | bHLH ( <i>bHLH121</i> )  |                            |
| CHLCN-9    | AQHF039/QDg9<br>CQE76                            | Os09g28440        | 17305162-17305986        | ERF ( <i>B-3 group</i> )   |
|            |                                                  | Os09g36730        | 21190162-21189250        | Myb ( <i>Hv1</i> )         |
|            |                                                  | Os09g32510        | 19405779-19, 07978       | bHLH                       |
| COLDTL-9   | AQAV002                                          | Os09g28440        | 17305162-17305986        | ERF ( <i>B-3 group</i> )   |
| SDLVIG-9   | AQEP006                                          | Os09g35020        | 20399717-20398977        | ERF ( <i>DREB1D/CBF4</i> ) |
|            |                                                  | Os09g35010        | 20395679-20395023        | ERF ( <i>DREB1B/CBF1</i> ) |
|            | AQEP006                                          | Os09g32510        | 19405779-19407978        | bHLH                       |
|            | AQFR051                                          | Os09g28440        | 17305162-17305986        | ERF ( <i>B-3 group</i> )   |
| LFRL-9     | DQE30/DQE32                                      | Os09g35020        | 20399717-20398977        | ERF ( <i>DREB1D/CBF3</i> ) |
|            |                                                  | Os09g35010        | 20395679-20395023        | ERF ( <i>DREB1B/CBF1</i> ) |
| SALTSN-9   | AQEM007/qRNC-9                                   | Os09g28440        | 17305162-17305986        | ERF ( <i>B-3 group</i> )   |
| COLDTL-10  | CQAA11                                           | Os10g27360        | 14105606-14107132        | NAC                        |
|            |                                                  | Os10g23050        | 11684489-11686357        | bHLH ( <i>bHLH45</i> )     |
| GERMSP-11  | CQY5/qLTG11                                      | Os11g45850        | 27233334-27234376        | WRKY ( <i>OsWRKY61</i> )   |

\*COLDTL (cold tolerance), CHLCN (chlorophyll content), GERMSP (speed of germination), LFRL (leaf rolling), OSADJCAP (osmotic adjustment capacity), RELWCN (relative water content), SALTSN (salt sensitivity), SDLVIG (seedling vigor).
